# Supplementary material
Source: PubMed Central journal article supplement (PMC4875180)
Supplement: 13238_2011_1065_MOESM1_ESM.pdf [file 13238_2011_1065_MOESM1_ESM.pdf]

|           | RRM zf-RanBP mutations                                                                                                    |     |
|-----------|---------------------------------------------------------------------------------------------------------------------------|-----|
| HsFUSa    | MASNDYTQQAATQSYGAYPTQPGQGYSSQSSQPYGQQSYSGYQSTDTSGYGGSSYS-SYG                                                              | 59  |
| BtFUS     | MASNDYTQQAATQSYGAYPTQPGQGYSSQSSQPYGQQSYSGYQSTDTSGYGGSSYS-SYG                                                              | 60  |
| MmFUS     | MASNDYTQQAATQSYGAYPTQPGQGYSSQSSQPYGQQSYSGYQSSADTSGYGGSSYS-SYG                                                             | 60  |
| RnFUS     | MASNDYTQQAATQSYGAYPTQPGQGYSSQSSQPYGQQSYSGYQSSADTSGYGGSSYS-SYG                                                             | 60  |
| DmCaz     | -----MERGGY-----                                                                                                          | 7   |
| CeC27H5.3 | -----MAAYDQSQPDYSTPEGQQAAYWAYYYQQQQQGGQPDQ-----                                                                           | 38  |
| HsFUSa    | QSQNTGYGTQSTPQGYGSGTGGYSSSSQSSSYGQQSSYPGYGQQPAPSS TSG SYG SSSQS                                                           | 119 |
| BtFUS     | QTQNS-YSTQSA PQGYGSA GGYSSSSQSSSYGQQSSYPGYGQQPAPSS TSG SYG SSSQS                                                          | 119 |
| MmFUS     | QTQNTGYGTQSA PQGYGSGTGGYSSSSQSSSYGQQSSYPGYGQQPAPSS TSG SYG SSSQS                                                          | 120 |
| RnFUS     | QTQNTGYGTQSA PQGYGSGTGGYSSSSQSSSYGQQSSYPGYGQQPAPSS TSG SYG SSSQS                                                          | 120 |
| DmCaz     | -----GGSGQYNNFAVPPPNYQMPNKTGNYNEPPN-----                                                                                  | 40  |
| CeC27H5.3 | -----DPYAAAAYGGHDQAQQPQNPYAPPPPGADPYGGSGGQSGG-----                                                                        | 80  |
| HsFUSa    | SSYQGPQSGSYSQPQSYGCGQQSYGQQSS-YNPPQGYGQQNQYNSSSGCGGGGGGNYG                                                                | 178 |
| BtFUS     | SGYQGPQGGYGGQSSYGGQQSSYGGQQSS-YNPPQGYGQQSQYNSSS-GGGGGGGG-SYG                                                              | 176 |
| MmFUS     | SSYQGPQSGGYGQQSSYGGCGQQSYGQQSSYNPPQGYGQQNQYNSSSGCGGGGGG-NYG                                                               | 179 |
| RnFUS     | SSYQGPQSGGYGQQSSYGGCGQQSYGQQSSYNPPQGYGQQNQYNSSSGCGGGGGG-NYG                                                               | 179 |
| DmCaz     | -----YGK-QGGYD SGSGHRG-----SGG S GNGGGGG-----                                                                             | 68  |
| CeC27H5.3 | DPYGGSRGGGGGFGGSRG-----GGGYDGGRRGSRGYDG                                                                                   | 116 |
| HsFUSa    | QDQSSMSGGGGGGYGNQDQSGGGGS-GGYGQQDRGGRGRGGSGGGGGGGGYNRSSG                                                                  | 237 |
| BtFUS     | QDQP S MS S G G G - G G G Y G N Q D Q S G G - - - - - Y G G G Q D R G G R G R G - - - - - G G G Y N R S S G               | 223 |
| MmFUS     | QDQSSMSGGGG-GGGYGNQDQSGGGGGYGGQQDRGGRGRGG-----GGGYNRSSG                                                                   | 230 |
| RnFUS     | QDQSSMSGGGG-GGGYGNQDQSGGGGGYGGQQDRGGRGRGG-----GGGYNRSSG                                                                   | 230 |
| DmCaz     | -----SWNDRGG-NSYGN-----GGASKD-----SYNKGHG                                                                                 | 93  |
| CeC27H5.3 | GRGGYGGDRGGRRGGGGYDGERGGRSRWDDGMSDRQGGPPGG-----RGGYQDRGP                                                                  | 168 |
| HsFUSa    | G Y E P R G R G G R G G R G M G S D R G G F N K F G G P R D Q G S R H D S E Q D N S D N N I F W Q L G E N V T             | 297 |
| BtFUS     | G Y E P R G R G G R G G R G M G S D R G G F N K F G G P R D Q G S R H D S E Q D N S D N N I F W Q L G E N V T             | 283 |
| MmFUS     | G Y E P R G R G G R G G R G M G S D R G G F N K F G G P R D Q G S R H D S E Q D N S D N N I F W Q L G E N V T             | 290 |
| RnFUS     | G Y E P R G R G G R G G R G M G S D R G G F N K F G G P R D Q G S R H D S E Q D N S D N N I F W Q L G E N V T             | 290 |
| DmCaz     | G Y S G G G G G G G G G G S G G N D - - - - - M I T Q E D I I F W S G M D P S T T                                         | 132 |
| CeC27H5.3 | R R D G P P S G G G Y G G G G A A S C N R E F G - - - - - S D G R V E L K E I V F W G G I S T I A N                       | 213 |
| HsFUSa    | I E S V A D Y F K Q I G I I K T N K K T G Q P M I N L Y T D R E T G K L K G E A T V S F D D P P S A K A A I D W F D G K   | 357 |
| BtFUS     | I E S V A D Y F K Q I G I I K T N K K T G Q P M I N L Y T D R E T G K L K G E A T V S F D D P P S A K A A I D W F D G K   | 343 |
| MmFUS     | I E S V A D Y F K Q I G I I K T N K K T G Q P M I N L Y T D R E T G K L K G E A T V S F D D P P S A K A A I D W F D G K   | 350 |
| RnFUS     | I E S V A D Y F K Q I G I I K T N K K T G Q P M I N L Y T D R E T G K L K G E A T V S F D D P P S A K A A I D W F D G K   | 350 |
| DmCaz     | E Q D I E T H F G A I G I I K K D K R T M K P K I W L Y K N K E T G A S K G E A T V T Y D D T N A A Q S A I E W F D G R   | 192 |
| CeC27H5.3 | B A Y I A D V P S T G C D I A K N D R G - - P R I K I Y T D R N T G E P K G C E M I T F V D A S A A Q Q A I T M T Y N G Q | 271 |
| HsFUSa    | E F S G - - N P I K V S F A T R R A D F N - - R G G G N R G - - G R G R G G P M G - R G G Y G G - - G G S G G G G R G     | 408 |
| BtFUS     | E F S G - - N P I K V S F A T R R A D F N - - R G G G N R G - - G R G R G G P M G - R G G Y G G - - G G S G G G G R G     | 394 |
| MmFUS     | E F S G - - N P I K V S F A T R R A D F N - - R G G G N R G - - G R G R G G P M G - R G G Y G G - - G G S G G G G R G     | 401 |
| RnFUS     | E F S G - - N P I K V S F A T R R A D F N - - R G G G N R G - - G R G R G G P M G - R G G Y G G - - G G S G G G G R G     | 401 |
| DmCaz     | D F N G - - N A I K V S L A Q R G N N W N - - K G G G G G G - - G G R G G F G G - R R G G G - - G G G G G G G G           | 243 |
| CeC27H5.3 | P F P G G S S P M S I S L A K F R A D A G G E R G G R G G R G F G G G R G G P M G R G G F G G D R G G Y G G G G R         | 331 |
| HsFUSa    | G - F P S G G G G G G - - - - - Q Q R A G D W K C P N P T C E N M N F S W R N E C N Q C K A P                             | 450 |
| BtFUS     | G - F P S G G G G G G - - - - - Q Q R A G D W K C P N P T C E N M N F S W R N E C N Q C K A P                             | 436 |
| MmFUS     | G - F P S G G G G G G - - - - - Q Q R A G D W K C P N P T C E N M N F S W R N E C N Q C K A P                             | 443 |
| RnFUS     | G - F P S G G G G G G - - - - - Q Q R A G D W K C P N P T C E N M N F S W R N E C N Q C K A P                             | 443 |
| DmCaz     | G R F D R G G G G G G R Y D R G G G G G G G G N V Q P R D G D W K C N - - S C N N T N F A W R N E C N R C K T P           | 301 |
| CeC27H5.3 | G G F D G R G G G G - - - - - F R G G D R G G F R G G D R G G F R G G D R G G F R G G D                                   | 372 |
| HsFUSa    | K P D - - - - - G P G G G P G G S H M G G N Y - - G D D R R G G R G G Y D - - R G G Y R G R G G D R G G F R G G R         | 498 |
| BtFUS     | K P D - - - - - G P G G G P G G S H M G G N Y - - G D D R R G G R G G Y D - - R G G Y R G R G G D R G G F R G G R         | 484 |
| MmFUS     | K P D - - - - - G P G G G P G G S H M G G N Y - - G D D R R G - R G G Y D - - R G G Y R G R G G D R G G F R G G R         | 490 |
| RnFUS     | K P D - - - - - G P G G G P G G S H M G G N Y - - G D D R R G - R G G Y D - - R G G Y R G R G G D R G G F R G G R         | 490 |
| DmCaz     | K G D D E G S S G G G G G Y G G G G G G Y D R G N D R G S G G G Y H N R D R G G N S Q G G G G G G G G G Y                 | 361 |
| CeC27H5.3 | R G G - - - - - D R G G F R G G R G V G G G N A N M E Q R K N D W P C E Q - - - - - C G N S N F A F R E C N Q C Q A       | 421 |
| HsFUSa    | G - - - - - G G D R G G F G P G K M D S R - - G E H R Q D R - - R E R P Y                                                 | 526 |
| BtFUS     | G - - - - - G G D R G G F G P G K M D S R - - G E H R Q D R - - R E R P Y                                                 | 512 |
| MmFUS     | G - - - - - G G D R G G F G P G K M D S R - - G E H R Q D R - - R E R P Y                                                 | 518 |
| RnFUS     | G - - - - - G G D R G G F G P G K M D S R - - G E H R Q D R - - R E R P Y                                                 | 518 |
| DmCaz     | S R F N D N N G G G R G G R G G G G N R D G G P M R N D G G M R S R P Y                                                   | 399 |
| CeC27H5.3 | P - - - - - R P D G G S G G G G E R R - G G P P G G D R - - Y R P Y                                                       | 448 |

Figure S1. Peptide sequence alignments of FUS proteins from different species, including human (Hs), bovine (Bt), mouse (Mm), rat (Rn), fly (Dm) and worm (Ce). The amino acid residues that are identical across all species are in red (\*). RNA recognition motif (RRM) and zinc finger (zf-) Ran-BP domain are highlighted in yellow and blue, respectively.

**Table S1.** Published ALS cases with FUS mutations: the age of onset and duration

|          | Subject  | Age of onset<br>(years) | Duration<br>(months) | Reference                |                          |
|----------|----------|-------------------------|----------------------|--------------------------|--------------------------|
|          | 1        | 13                      | 20                   | Huang et al., 2010       |                          |
| Sporadic | 2        | 22                      | 10                   | Baumer et al., 2010      |                          |
|          | 3        | 18                      | 11                   |                          |                          |
| P525L    | 1        | 21                      | <12                  | Chiò et al., 2009        |                          |
|          | 2        | 32                      | <12                  |                          |                          |
| Familial | 3        | 16                      | <12                  |                          |                          |
|          | 4        | 27                      | <24                  |                          |                          |
|          | 5        | 22                      | 6                    | Kwiatkowski et al., 2009 |                          |
| R524S    | Familial | 1                       | 34                   | 39                       | Kwiatkowski et al., 2009 |

ALS, amyotrophic lateral sclerosis.

## References

- Bäumer, D., Hilton, D., Paine, S.M., Turner, M.R., Lowe, J., Talbot, K., and Ansorge, O. (2010). Juvenile ALS with basophilic inclusions is a FUS proteinopathy with FUS mutations. *Neurology* 75, 611–618.
- Chiò, A., Restagno, G., Brunetti, M., Ossola, I., Calvo, A., Mora, G., Sabatelli, M., Monsurrò, M.R., Battistini, S., Mandrioli, J., *et al.*, and the ITALSGEN Consortium. (2009). Two Italian kindreds with familial amyotrophic lateral sclerosis due to FUS mutation. *Neurobiol Aging* 30, 1272–1275.
- Huang, E.J., Zhang, J., Geser, F., Trojanowski, J.Q., Strober, J.B., Dickson, D.W., Brown, R.H. Jr, Shapiro, B.E., and Lomen-Hoerth, C. (2010). Extensive FUS-immunoreactive pathology in juvenile amyotrophic lateral sclerosis with basophilic inclusions. *Brain Pathol* 20, 1069–1076.
- Kwiatkowski, T.J. Jr, Bosco, D.A., Leclerc, A.L., Tamrazian, E., Vanderburg, C.R., Russ, C., Davis, A., Gilchrist, J., Kasarskis, E.J., Munsat, T., *et al.* (2009). Mutations in the FUS/TLS gene on chromosome 16 cause familial amyotrophic lateral sclerosis. *Science* 323, 1205–1208.
